# Supplementary material
Source: PubMed Central journal article supplement (PMC6718089)
Supplement: NIHMS1045015-supplement-Fig_S1.pdf [file NIHMS1045015-supplement-Fig_S1.pdf]

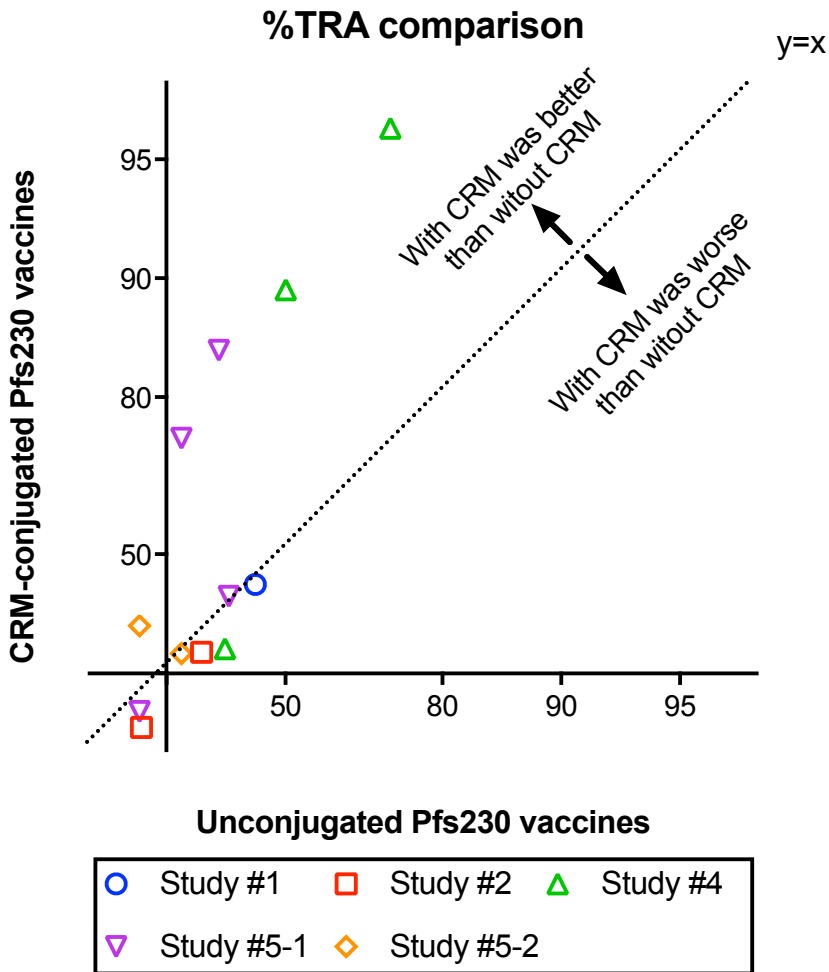

**Fig S1: Direct comparison of CRM-conjugated and unconjugated vaccines on %TRA.** The two groups of mice received the same dose of Pfs230 antigens and same adjuvant (Alum), but with or without CRM conjugation, were paired (e.g., samples #1 and #3 in Study #1) and compared for their %TRA in SMFA. A total of twelve pairs were included: One in Study #1, two in Study #2, three in Study #4, and six in Study #5. The %TRA of unconjugated vaccine is shown on the x-axis, and %TRA of the corresponding CRM-conjugated vaccine is shown on the y-axis. For Study #5, comparisons between MOS430 lot of CRM-conjugate vs. unconjugated vaccines are shown as Study #5-1, and the comparisons between MOS374 lot of CRM-vaccine are presented as Study #5-2; The same samples #2 and #4 data are paired twice with different batches of CRM-vaccines.
